# Supplementary material
Source: MDPI journal article supplement (https://www.mdpi.com/2073-4344/12/3/251)
Supplement: s1 [file s1]

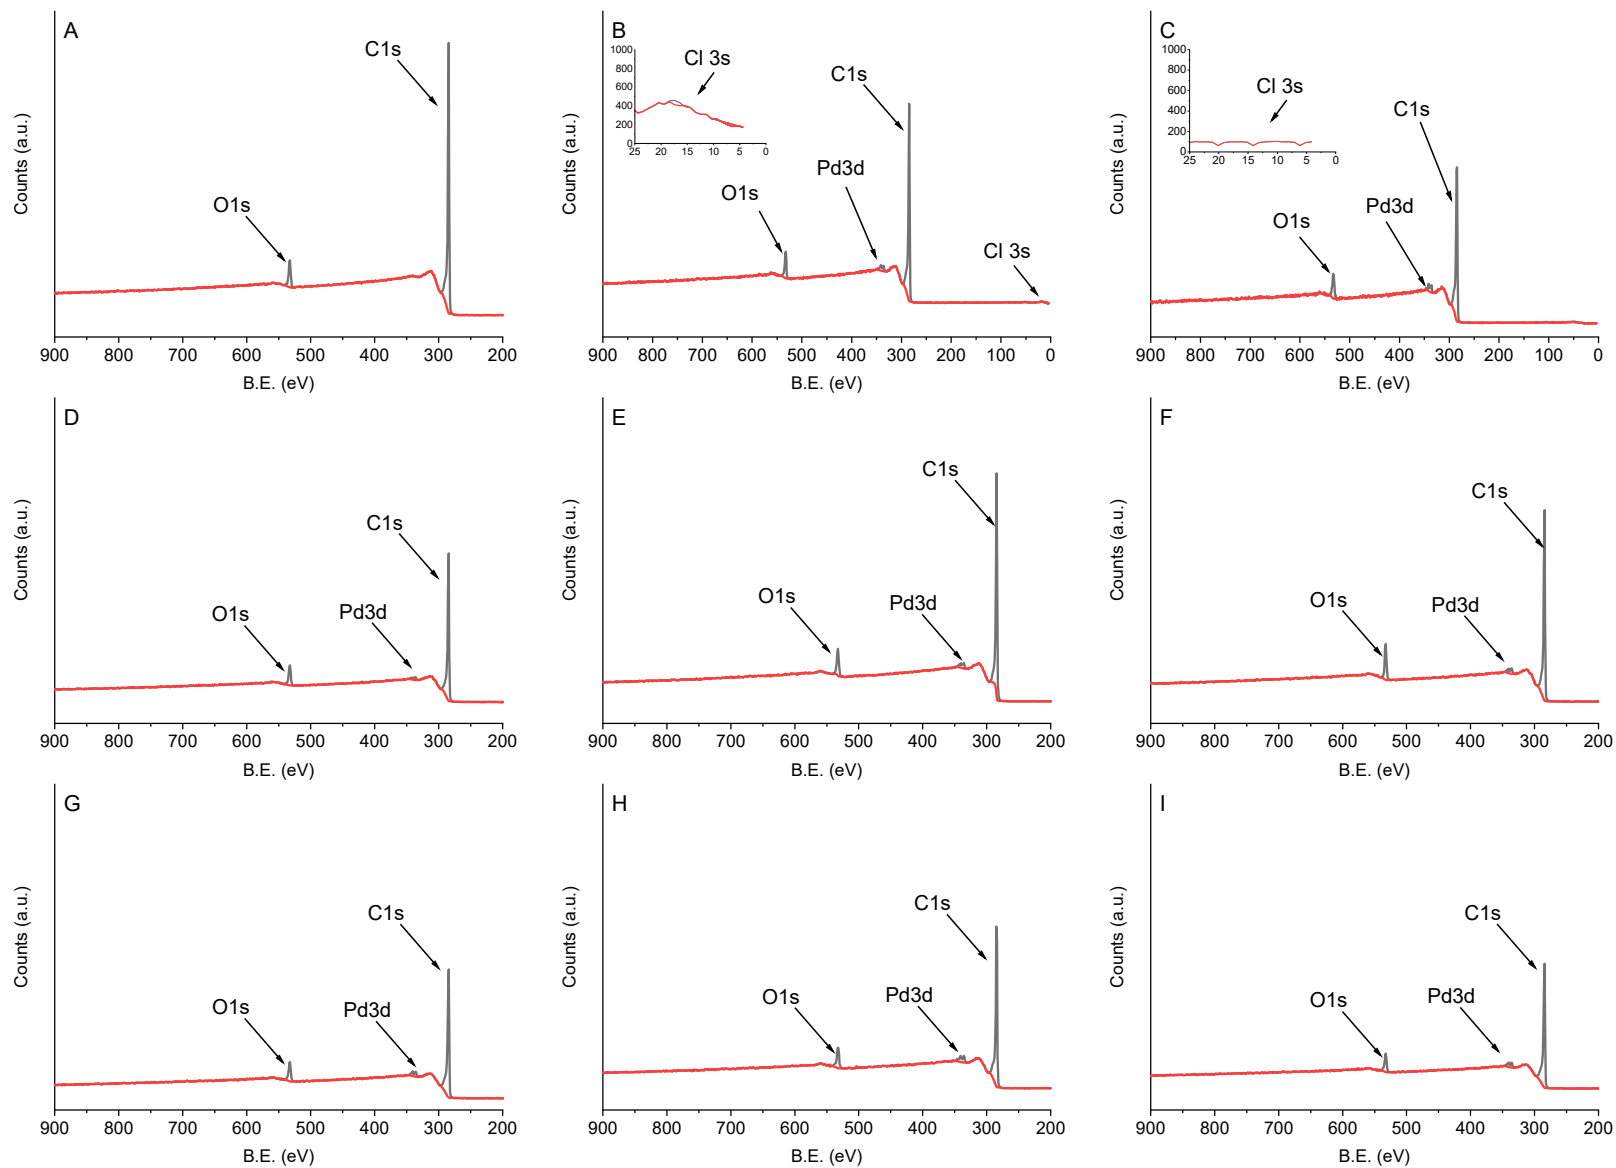

Figure S1: Survey spectra of A) bare GNP, B) Pd/GNP<sub>0.5</sub>-H<sub>2</sub>O-fast, C) w-Pd/GNP<sub>0.5</sub>-H<sub>2</sub>O-fast, D) w-Pd/GNP<sub>0.2</sub>-H<sub>2</sub>O-fast, E) w-Pd/GNP<sub>1.0</sub>-H<sub>2</sub>O-fast, F) w-Pd/GNP<sub>0.5</sub>-EtOH-fast, G) w-Pd/GNP<sub>0.5</sub>-EtOH/H<sub>2</sub>O-fast, H) w-Pd/GNP<sub>0.5</sub>-H<sub>2</sub>O-medium, I) w-Pd/GNP<sub>0.5</sub>-H<sub>2</sub>O-slow

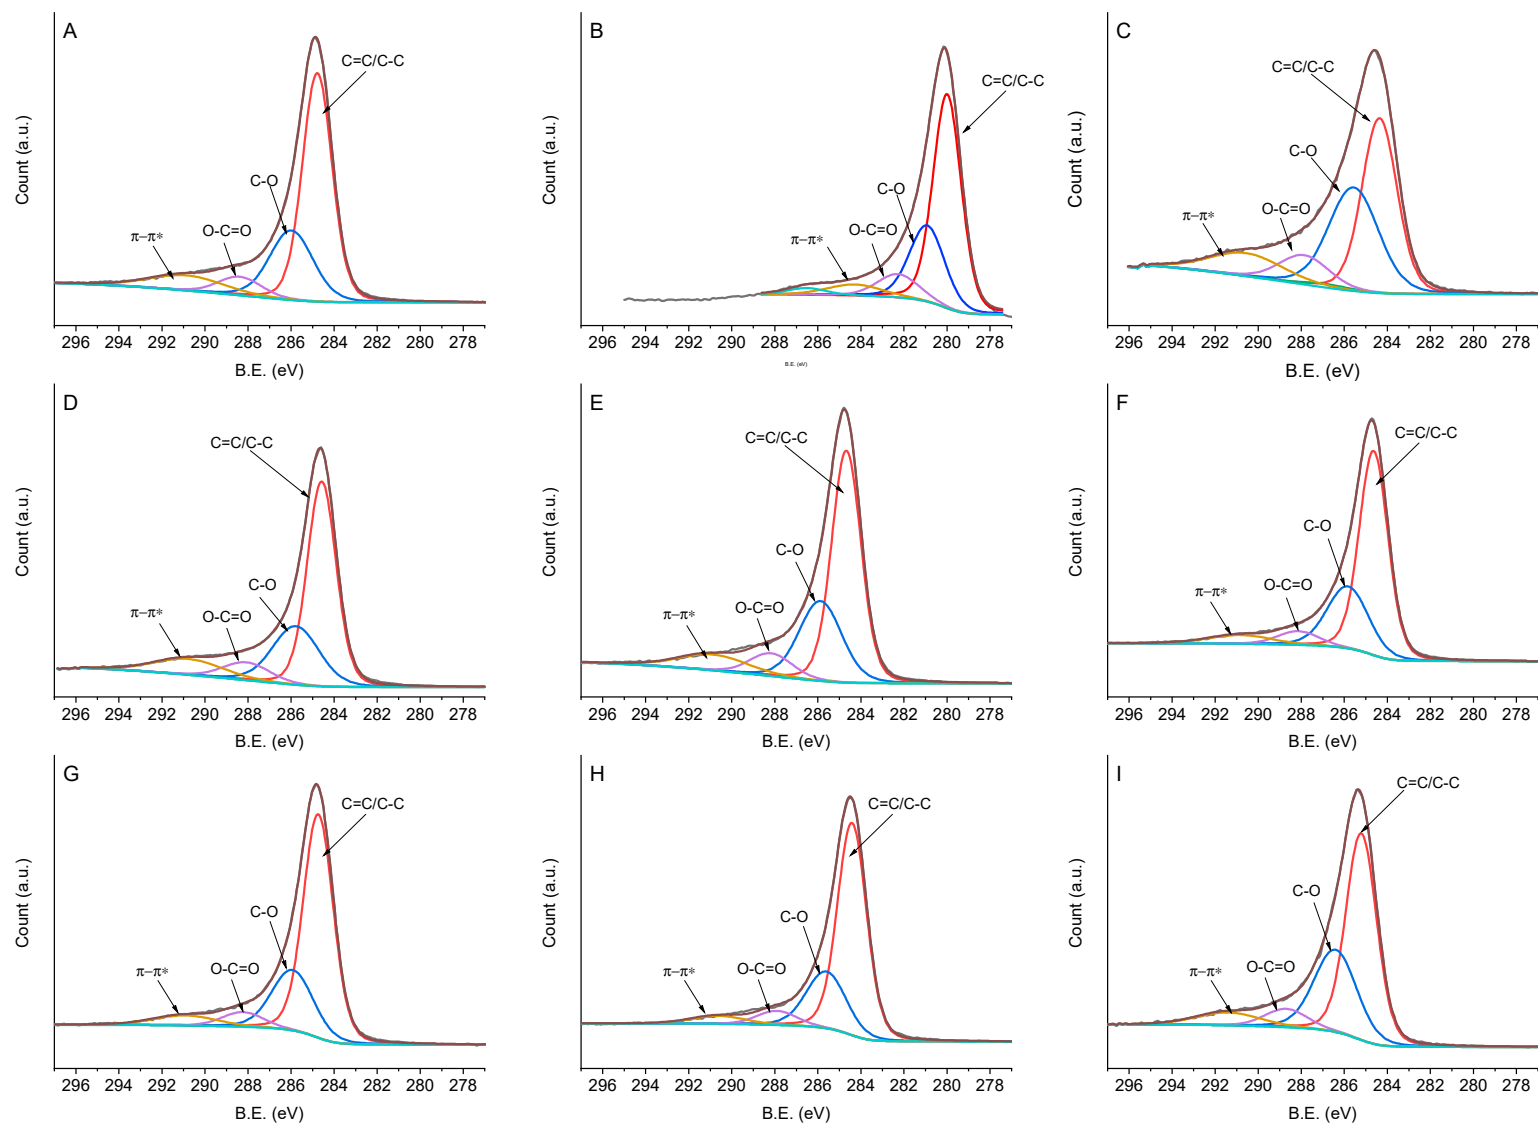

Figure S2: C1s region of A) bare GNP, B) Pd/GNP<sub>0.5</sub>-H<sub>2</sub>O-fast, C) w-Pd/GNP<sub>0.5</sub>-H<sub>2</sub>O-fast, D) w-Pd/GNP<sub>0.2</sub>-H<sub>2</sub>O-fast, E) w-Pd/GNP<sub>1.0</sub>-H<sub>2</sub>O-fast, F) w-Pd/GNP<sub>0.5</sub>-EtOH-fast, G) w-Pd/GNP<sub>0.5</sub>-EtOH/H<sub>2</sub>O-fast, H) w-Pd/GNP<sub>0.5</sub>-H<sub>2</sub>O-medium, I) w-Pd/GNP<sub>0.5</sub>-H<sub>2</sub>O-slow

Table S1: Results of the XPS analysis.

|                                                     |                  | Survey |        |      |        |       |        | C 1s    |        |        |        |        |
|-----------------------------------------------------|------------------|--------|--------|------|--------|-------|--------|---------|--------|--------|--------|--------|
|                                                     |                  | C      | O      | Cl   | Pd     | O/C   | Pd/C   | C=C/C-C | C-O    | C=O    | O=C-O  | p-p*   |
| GNP                                                 | <i>B.E. (eV)</i> | 284.50 | 532.50 | -    |        |       |        | 284.78  | 285.98 | 287.28 | 288.38 | 290.88 |
|                                                     | % At.            | 94.7   | 5.3    | -    | -      | 0.056 | -      | 57.8    | 25.6   | 0      | 6.8    | 9.7    |
| Pd/GNP <sub>0.5</sub> -H <sub>2</sub> O-fast        | <i>B.E. (eV)</i> | 284.60 | 532.60 | 17.5 |        |       |        | 284.61  | 285.96 | 287.17 | 288.11 | 290.84 |
|                                                     | % At.            | 92.1   | 7.8    | 0.10 | 0.16   | 0.084 | 0.0017 | 42.0    | 35.2   | 1.2    | 9.9    | 11.7   |
| w-Pd/GNP <sub>0.5</sub> -H <sub>2</sub> O-fast      | <i>B.E. (eV)</i> | 284.13 | 533.13 | -    | 341.13 |       |        | 284.65  | 285.9  | 287.15 | 288.05 | 290.85 |
|                                                     | % At.            | 93.2   | 6.2    | -    | 0.55   | 0.066 | 0.0059 | 51.3    | 26.7   | 0      | 7.3    | 14.7   |
| Pd/GNP <sub>0.2</sub> -H <sub>2</sub> O-fast        | <i>B.E. (eV)</i> | 284.75 | 533.75 | 17.7 | 335.75 |       |        | 284.63  | 285.86 | 287.21 | 288.12 | 290.54 |
|                                                     | % At.            | 93.9   | 5.8    | 0.12 | 0.21   | 0.062 | 0.0022 | 56.4    | 25.9   | 0      | 7.6    | 10.1   |
| w-Pd/GNP <sub>0.2</sub> -H <sub>2</sub> O-fast      | <i>B.E. (eV)</i> | 284.95 | 532.95 | -    | 335.95 |       |        | 284.58  | 285.78 | 287.08 | 288.08 | 290.77 |
|                                                     | % At.            | 93.8   | 5.7    | -    | 0.55   | 0.061 | 0.0059 | 56.1    | 25.8   | 0      | 7.9    | 10.3   |
| Pd/GNP <sub>1.0</sub> -H <sub>2</sub> O-fast        | <i>B.E. (eV)</i> | 284.60 | 532.60 | 17.6 | 336.6  |       |        | 284.61  | 285.37 | 286.89 | 289.42 | 290.43 |
|                                                     | % At.            | 93.0   | 6.5    | 0.09 | 0.41   | 0.069 | 0.044  | 51.7    | 31.2   | 1.4    | 7.9    | 7.8    |
| w-Pd/GNP <sub>1.0</sub> -H <sub>2</sub> O-fast      | <i>B.E. (eV)</i> | 284.38 | 532.38 | -    | 336.38 |       |        | 284.67  | 285.88 | 287.18 | 288.17 | 290.87 |
|                                                     | % At.            | 94.1   | 5.6    | -    | 0.27   | 0.059 | 0.0029 | 57.8    | 26.2   | 0.1    | 7.2    | 8.8    |
| Pd/GNP <sub>0.5</sub> -EtOH-fast                    | <i>B.E. (eV)</i> | 284.6  | 532.6  | 17.6 | 335.6  |       |        | 284.60  | 285.36 | 286.77 | 288.73 | 290.23 |
|                                                     | % At.            | 91.7   | 7.7    | 0.11 | 0.49   | 0.083 | 0.0053 | 53.2    | 34.7   | 2.2    | 6.2    | 3.7    |
| w-Pd/GNP <sub>0.5</sub> -EtOH-fast                  | <i>B.E. (eV)</i> | 284.43 | 532.43 | -    | 335.4  |       |        | 284.63  | 285.83 | 287.14 | 288.14 | 290.83 |
|                                                     | % At.            | 93.9   | 5.6    | -    | 0.53   | 0.059 | 0.0056 | 61.4    | 26.8   | 0.2    | 5.9    | 5.7    |
| w-Pd/GNP <sub>0.5</sub> -EtOH/H <sub>2</sub> O-fast | <i>B.E. (eV)</i> | 284.58 | 532.58 | -    | 335.58 |       |        | 284.73  | 285.93 | 287.23 | 288.23 | 290.93 |
|                                                     | % At.            | 94.1   | 5.5    | -    | 0.37   | 0.058 | 0.0039 | 64.0    | 23.9   | 0.2    | 5.8    | 6.1    |
| w-Pd/GNP <sub>0.5</sub> -H <sub>2</sub> O-medium    | <i>B.E. (eV)</i> | 284.46 | 532.46 | -    | 335.46 |       |        | 284.41  | 285.61 | 286.92 | 287.89 | 290.61 |
|                                                     | % At.            | 92.1   | 7.4    | -    | 0.37   | 0.080 | 0.0040 | 65.5    | 24.1   | 0      | 5.9    | 4.5    |
| w-Pd/GNP <sub>0.5</sub> -H <sub>2</sub> O-slow      | <i>B.E. (eV)</i> | 284.25 | 532.25 | -    | 336.25 |       |        | 285.21  | 286.4  | 287.71 | 288.68 | 291.42 |
|                                                     | % At.            | 93.8   | 5.8    | -    | 0.45   | 0.061 | 0.0048 | 55.5    | 30.6   | 0      | 7.0    | 7.2    |

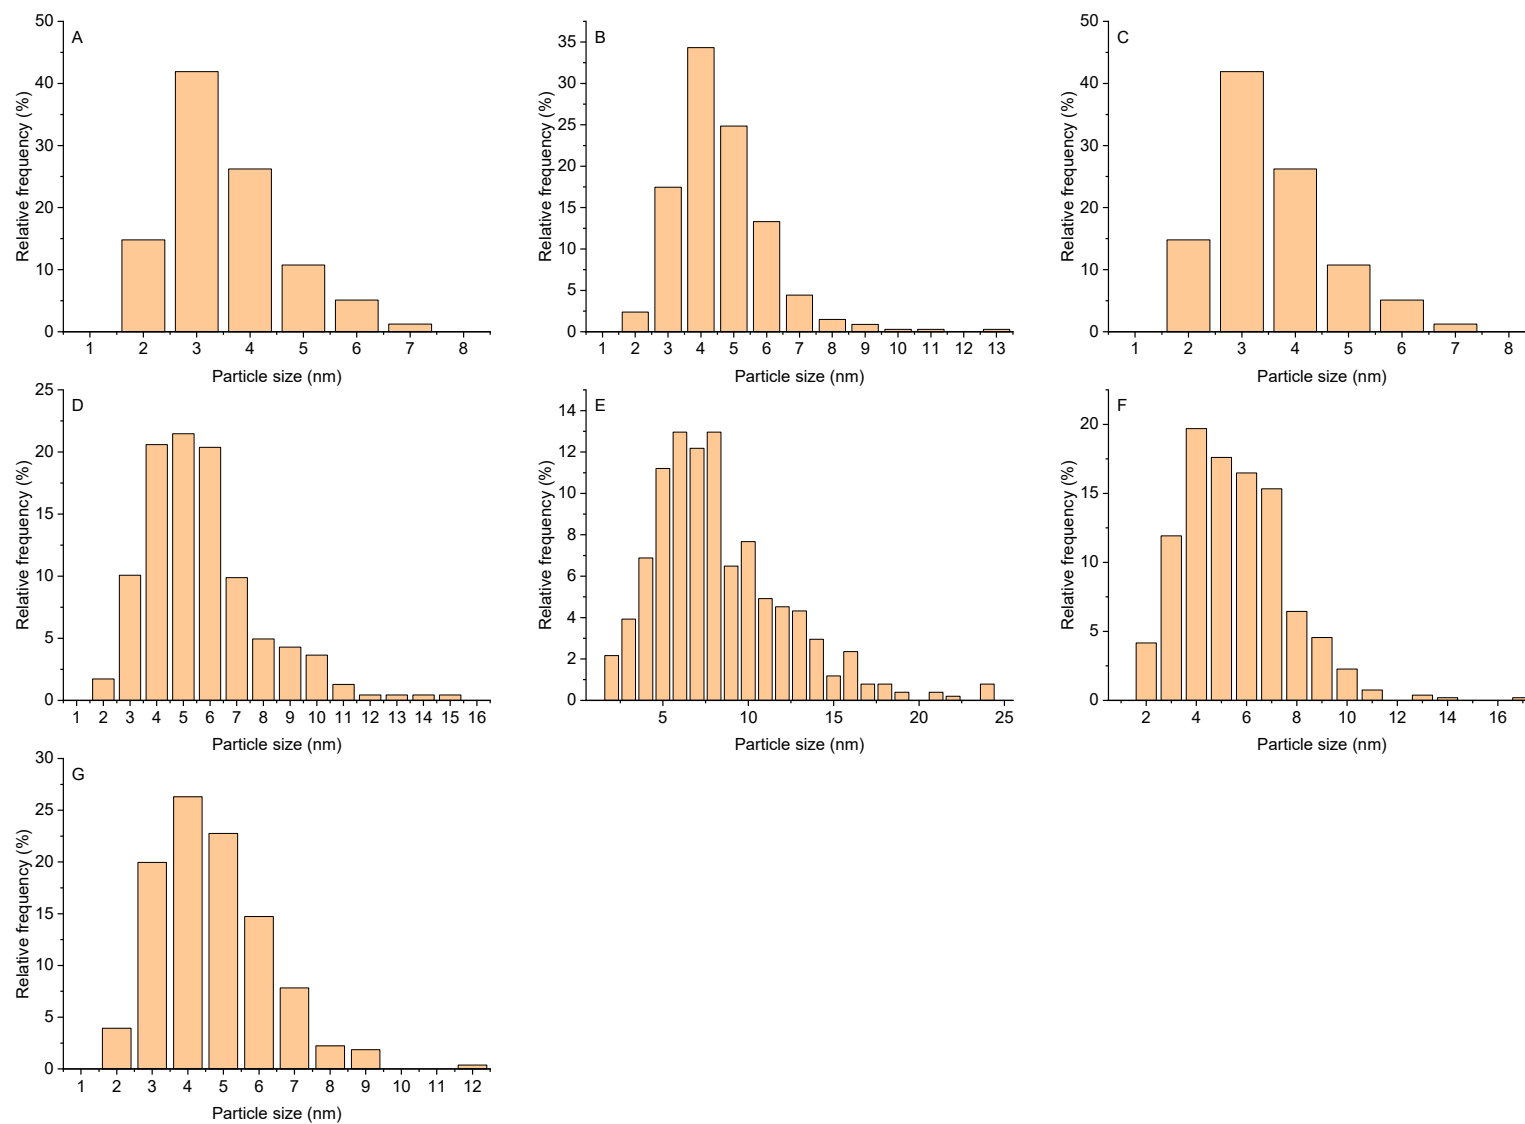

Figure S3: Particle size distribution obtained from TEM analyses of A) w-Pd/GNP<sub>0.5</sub>-H<sub>2</sub>O-fast, B) w-Pd/GNP<sub>0.2</sub>-H<sub>2</sub>O-fast, C) w-Pd/GNP<sub>1.0</sub>-H<sub>2</sub>O-fast, D) w-Pd/GNP<sub>0.5</sub>-EtOH-fast, E) w-Pd/GNP<sub>0.5</sub>-EtOH/H<sub>2</sub>O-fast, F) w-Pd/GNP<sub>0.5</sub>-H<sub>2</sub>O-medium, G) w-Pd/GNP<sub>0.5</sub>-H<sub>2</sub>O-slow catalysts.

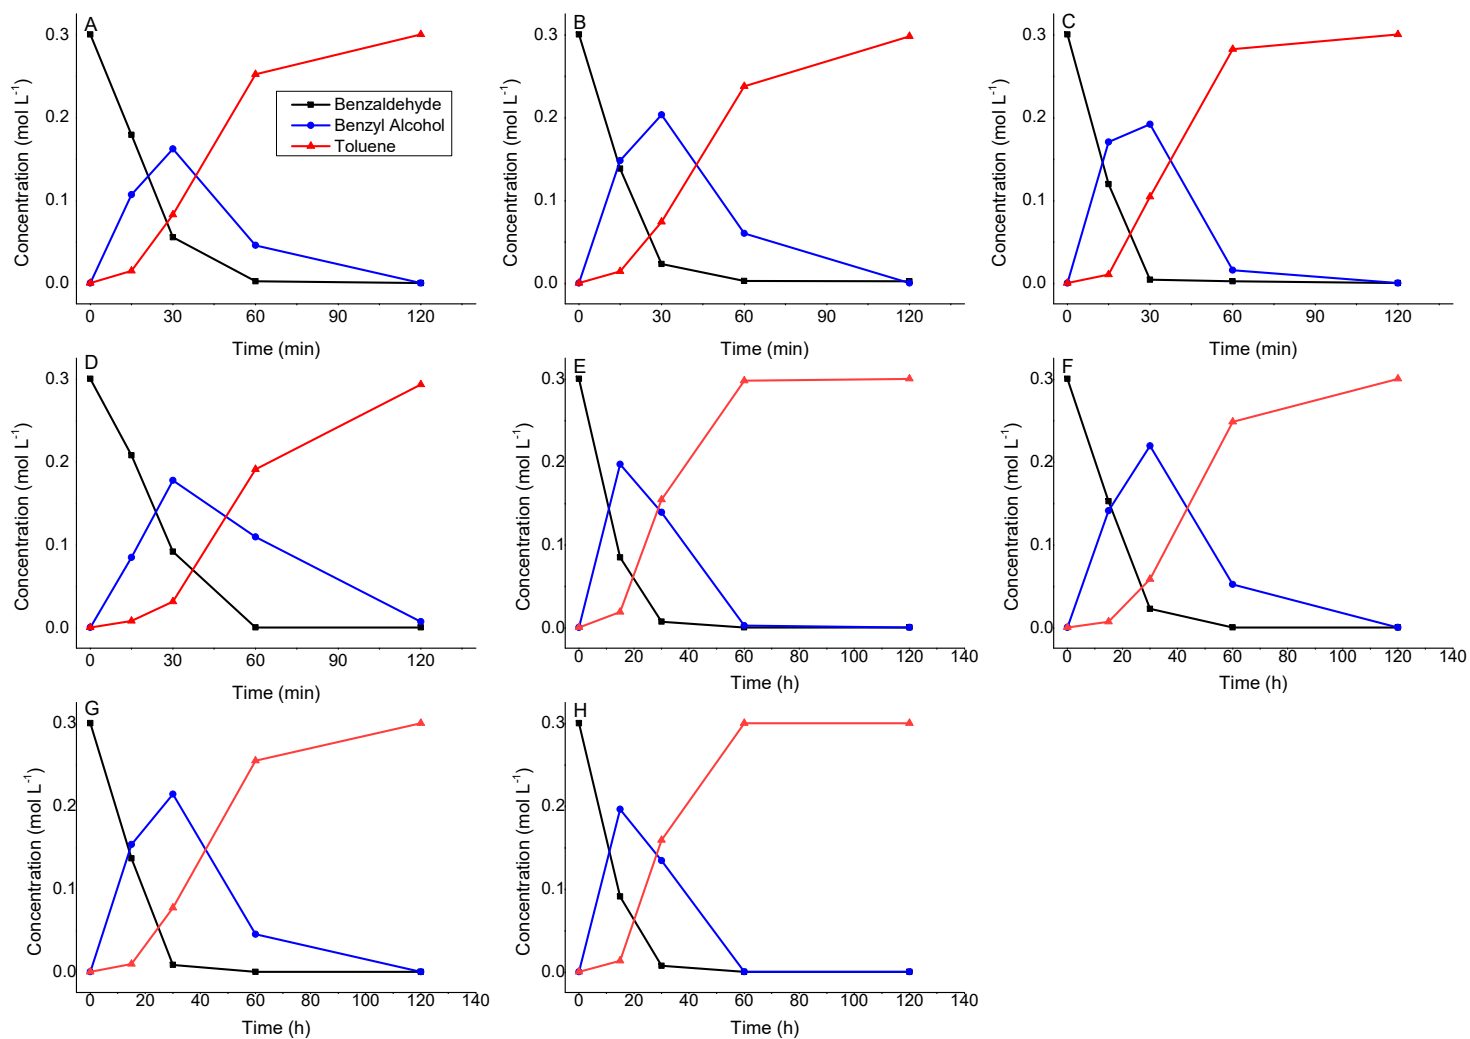

Figure S4: Reaction profile using A) Pd/GNP<sub>0.5</sub>-H<sub>2</sub>O-fast, B) w-Pd/GNP<sub>0.5</sub>-H<sub>2</sub>O-fast, C) w-Pd/GNP<sub>0.2</sub>-H<sub>2</sub>O-fast, D) w-Pd/GNP<sub>1.0</sub>-H<sub>2</sub>O-fast, E) w-Pd/GNP<sub>0.5</sub>-EtOH-fast, F) w-Pd/GNP<sub>0.5</sub>-EtOH/H<sub>2</sub>O-fast, G) w-Pd/GNP<sub>0.5</sub>-H<sub>2</sub>O-medium, H) w-Pd/GNP<sub>0.5</sub>-H<sub>2</sub>O-slow catalysts.

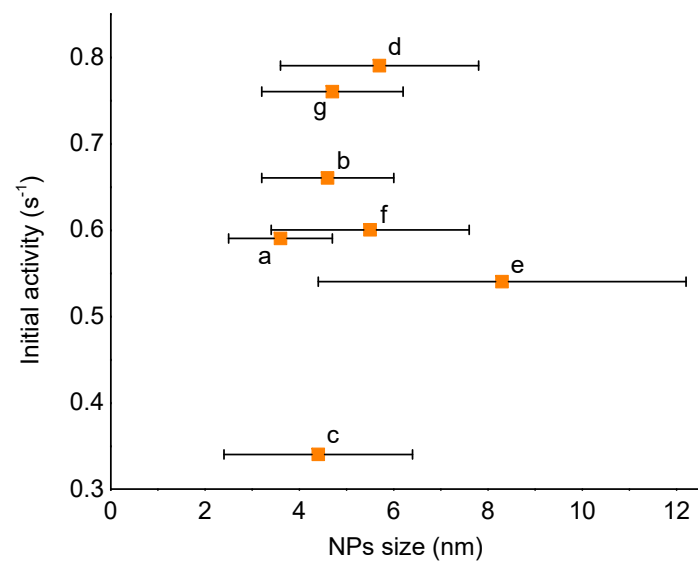

Figure S5: Influence of NPs size on the initial activity of the different catalysts: (a) Pd/GNP<sub>0.5</sub>-H<sub>2</sub>O-fast, (b) Pd/GNP<sub>0.2</sub>-H<sub>2</sub>O-fast, (c) Pd/GNP<sub>1.0</sub>-H<sub>2</sub>O-fast, (d) Pd/GNP<sub>0.5</sub>-EtOH-fast, (e) Pd/GNP<sub>0.5</sub>-EtOH/H<sub>2</sub>O-fast, (f) Pd/GNP<sub>0.5</sub>-H<sub>2</sub>O-medium, (g) Pd/GNP<sub>0.5</sub>-H<sub>2</sub>O-slow.

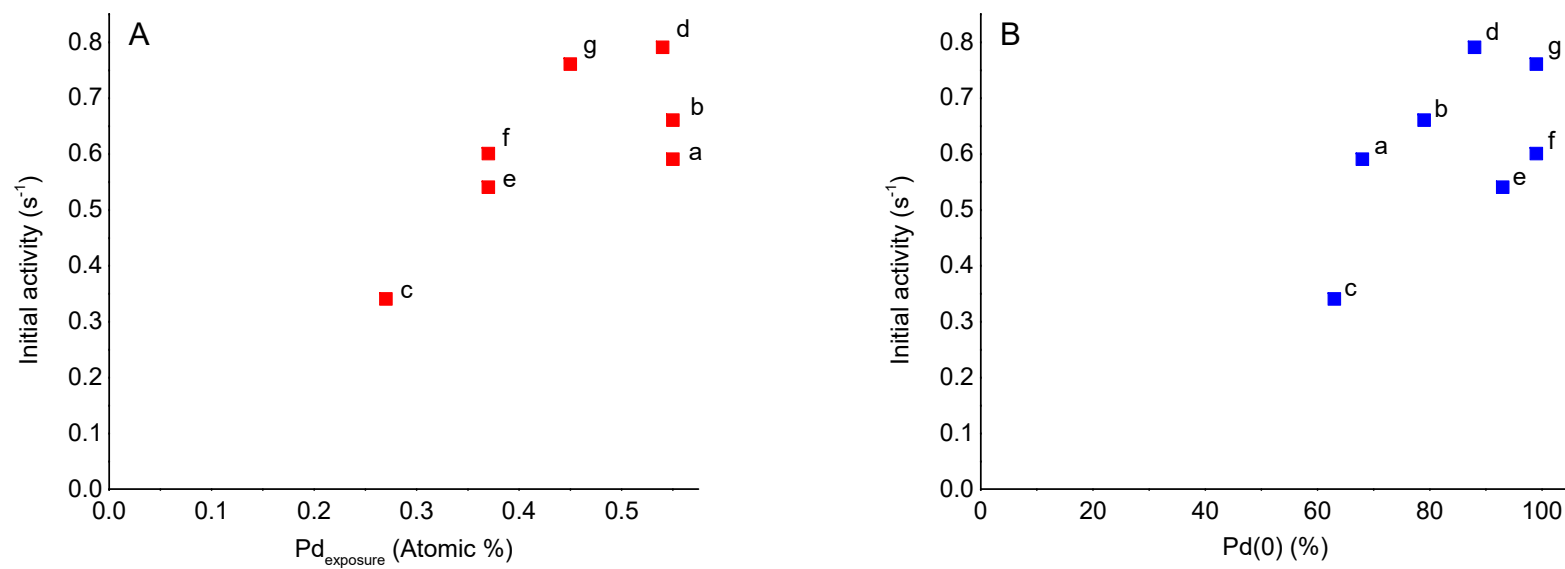

Figure S6: Influence of the A) Pd exposure and B) Pd(0) amount on the activity of the different catalysts: (a) Pd/GNP<sub>0.5</sub>-H<sub>2</sub>O-fast, (b) Pd/GNP<sub>0.2</sub>-H<sub>2</sub>O-fast, (c) Pd/GNP<sub>1.0</sub>-H<sub>2</sub>O-fast, (d) Pd/GNP<sub>0.5</sub>-EtOH-fast, (e) Pd/GNP<sub>0.5</sub>-EtOH/H<sub>2</sub>O-fast, (f) Pd/GNP<sub>0.5</sub>-H<sub>2</sub>O-medium, (g) Pd/GNP<sub>0.5</sub>-H<sub>2</sub>O-slow.
